1 **Proteogenomic single cell analysis of skeletal muscle myocytes**

2

3 Katherine M. Fomchenko<sup>1,4</sup>, Rohan X. Verma<sup>1,4</sup>, Suraj Kannan<sup>2</sup>, Brian L. Lin<sup>2</sup>, Xiaoping Yang<sup>1</sup>,

4 Tim O. Nieuwenhuis<sup>1</sup>, Arun H. Patil<sup>1</sup>, Karen Fox-Talbot<sup>1</sup>, Matthew N. McCall<sup>3</sup>, Chulan Kwon<sup>2</sup>,

5 David A. Kass<sup>2</sup>, Avi Z. Rosenberg<sup>1</sup>, Marc K. Halushka<sup>1\*</sup>

6

7 1 Department of Pathology, Johns Hopkins University School of Medicine, Baltimore, MD, USA

8 2 Division of Cardiology, Department of Medicine, Johns Hopkins University School of  
9 Medicine, Baltimore, MD, USA

10 3 Department of Biostatistics and Computational Biology, University of Rochester Medical  
11 Center, Rochester, NY, USA

12 4 These authors contributed equally to this project

13

14 Email Addresses:

15 [Kfomche1@jhmi.edu](mailto:Kfomche1@jhmi.edu)

16 [Rverma6@jhmi.edu](mailto:Rverma6@jhmi.edu)

17 [Skannan4@jhmi.edu](mailto:Skannan4@jhmi.edu)

18 [Blin29@jhmi.edu](mailto:Blin29@jhmi.edu)

19 [Xyang15@jhmi.edu](mailto:Xyang15@jhmi.edu)

20 [Tnieuwe1@jhmi.edu](mailto:Tnieuwe1@jhmi.edu)

21 [Ahanuma2@jhmi.edu](mailto:Ahanuma2@jhmi.edu)

22 [ktalbot@jhmi.edu](mailto:ktalbot@jhmi.edu)

23 [matthew\\_mccall@urmc.rochester.edu](mailto:matthew_mccall@urmc.rochester.edu)

24 [ckwon13@jhmi.edu](mailto:ckwon13@jhmi.edu)

25 [dkass@jhmi.edu](mailto:dkass@jhmi.edu)

26 [arosen34@jhmi.edu](mailto:arosen34@jhmi.edu)

27 [mhalush1@jhmi.edu](mailto:mhalush1@jhmi.edu)

28

29 \* Correspondence and address for reprints to:

30 Marc K. Halushka, M.D., Ph.D.

31 Johns Hopkins University School of Medicine

32 Ross Bldg. Rm 632B

33 720 Rutland Avenue

34 Baltimore, MD 21205

35 410-614-8138 (ph)

36 410-502-5862 (fax)

37 [mhalush1@jhmi.edu](mailto:mhalush1@jhmi.edu)

38

39 **Abstract**

40

41 Skeletal muscle myocytes have evolved into slow and fast-twitch types. These types are  
42 functionally distinct as a result of differential gene and protein expression. However, an  
43 understanding of the complexity of gene and protein variation between myofibers is unknown.  
44 We performed deep, whole cell, single cell RNA-seq on intact and fragments of skeletal  
45 myocytes from the mouse flexor digitorum brevis muscle. We compared the genomic expression  
46 data of 171 of these cells with two human proteomic datasets. The first was a spatial proteomics  
47 survey of mosaic patterns of protein expression utilizing the Human Protein Atlas (HPA) and the  
48 HPASubC tool. The second was a mass-spectrometry (MS) derived proteomic dataset of single  
49 human muscle fibers. Immunohistochemistry and RNA-ISH were used to understand variable  
50 expression. scRNA-seq identified three distinct clusters of myocytes (a slow/fast 2A cluster and  
51 two fast 2X clusters). Utilizing 1,605 mosaic patterned proteins from visual proteomics, and 596  
52 differentially expressed proteins by MS methods, we explore this fast 2X division. Only 36  
53 genes/proteins had variable expression across all three studies, of which nine are newly described  
54 as variable between fast/slow twitch myofibers. An additional 414 genes/proteins were identified  
55 as variable by two methods. Immunohistochemistry and RNA-ISH generally validated variable  
56 expression across methods presumably due to species-related differences. In this first integrated  
57 proteogenomic analysis of mature skeletal muscle myocytes we confirm the main fiber types and  
58 greatly expand the known repertoire of twitch-type specific genes/proteins. We also demonstrate  
59 the importance of integrating genomic and proteomic datasets.

60

61 **Key Words:** single cell RNA-sequencing; proteogenomics; skeletal muscle, twitch

## 62 **Introduction**

63           Skeletal muscle is a voluntary, striated muscle found throughout the body with  
64 contraction regulated by nerve impulses through the neuromuscular junction (NMJ). Skeletal  
65 muscles consist of different fiber types delineated by the isoform of the myosin heavy chain they  
66 express, metabolic function, and other properties (1). In humans, slow fibers (type 1) and some  
67 fast fibers (type 2A) exhibit oxidative metabolic properties, while fast type 2X fibers exhibit  
68 glycolytic metabolic properties (2). Mice have an additional type 2B fast fiber. These fiber types  
69 are variable across different muscles of the body reflecting different functional needs (2, 3).

70           Multiple proteins and protein classes vary across fiber types (1, 4). These include  
71 isoforms of the myosin heavy and light chains, calcium ATPase pumps, troponin T, and  
72 tropomyosin proteins, as well as metabolic proteins, such as pyruvate kinase, GAP  
73 dehydrogenase, and succinate dehydrogenase. Beyond these classes, there have been few efforts  
74 to catalog the entirety of fast/slow twitch expression differences by proteomics or genomics.

75           Among proteins, the deepest effort, to date, has been the single fiber proteomics work of  
76 the Mann laboratory (5, 6). In separate studies of mouse and human single fiber skeletal muscles,  
77 1,723 and 3,585 proteins were reported, respectively, many of which were variably expressed  
78 among slow and fast twitch fibers. The most comprehensive gene expression study was  
79 performed in mice using DNA microarrays across ten type 1 and ten type 2B fibers (7). Single  
80 cell RNA-sequencing (scRNA-seq) also has been performed in skeletal muscle and muscle  
81 cultures. However, the large size of skeletal myocytes has precluded them from these datasets,  
82 which are instead predominately satellite cells, and other supporting cell types (8-15). A recent  
83 publication used SMART-Seq to evaluate three fast twitch mouse fibers (16). The totality of

84 these studies strongly suggests there are numerous expression differences between skeletal  
85 muscle fiber types and a need for new approaches to capture this diversity.

86 The Kwon laboratory recently developed a large cell sorting method to isolate mature  
87 cardiac myocytes (17). We ascertained if this method could be used to isolate the even larger  
88 skeletal muscle myocytes for scRNA-seq. Our goal was to combine this genetic data with single  
89 cell spatial proteomic data from the Human Protein Atlas (HPA) and an established mass  
90 spectrometry human skeletal muscle proteomic dataset for a unique proteogenomic  
91 characterization of skeletal muscle expression mosaicism.

## 92 **Results:**

### 93 **scRNA-seq and identification of fast/slow twitch fiber types**

94 We performed single cell RNA-seq using the established mcSCRIB-seq protocol (18, 19).  
95 We recovered data for 763 cells and sequenced to a median depth of 108,110 reads per cell. As  
96 we were unsure of where the ideal skeletal myocytes might arise from our flow-sorting method,  
97 they were taken from two different gates set on extinction (EXT) always “high” and time of  
98 flight (TOF) being both high or low (Supplementary Fig. 1). Additional cells were collected  
99 from a pseudo-biopsy approach with fragmented skeletal myocytes (see methods). Preliminary  
100 analyses, however, indicated a distinct cluster of cells with a high percentage of mitochondrial  
101 reads or otherwise low abundance reads. Notably, almost all of our pseudo-biopsy myocyte  
102 fragments and many TOF-low cells fell into this category. These quality control metrics likely  
103 indicated poor quality or sheared cells with loss of RNA. Thus, we excluded these cells and  
104 narrowed our analysis to the best 171 cells remaining with a median read count of 239,252 per  
105 cell.

106 An average of 12,098 transcripts were identified in these cells and all had the expression  
107 patterns of mature skeletal myocytes, highly expressing a myosin heavy chain isoform. Because  
108 of the narrow focus of this work to delineate cell subtypes and expression variability of just  
109 skeletal muscle myocytes, this isolation strategy linked to deep sequencing, proved to be  
110 advantageous.

111 We performed PCA of the data, corrected the data for the top 20 PCAs and utilized the  
112 top 3,000 variable genes (by +/- standard deviation) to cluster these cell types (Fig. 1a). Three

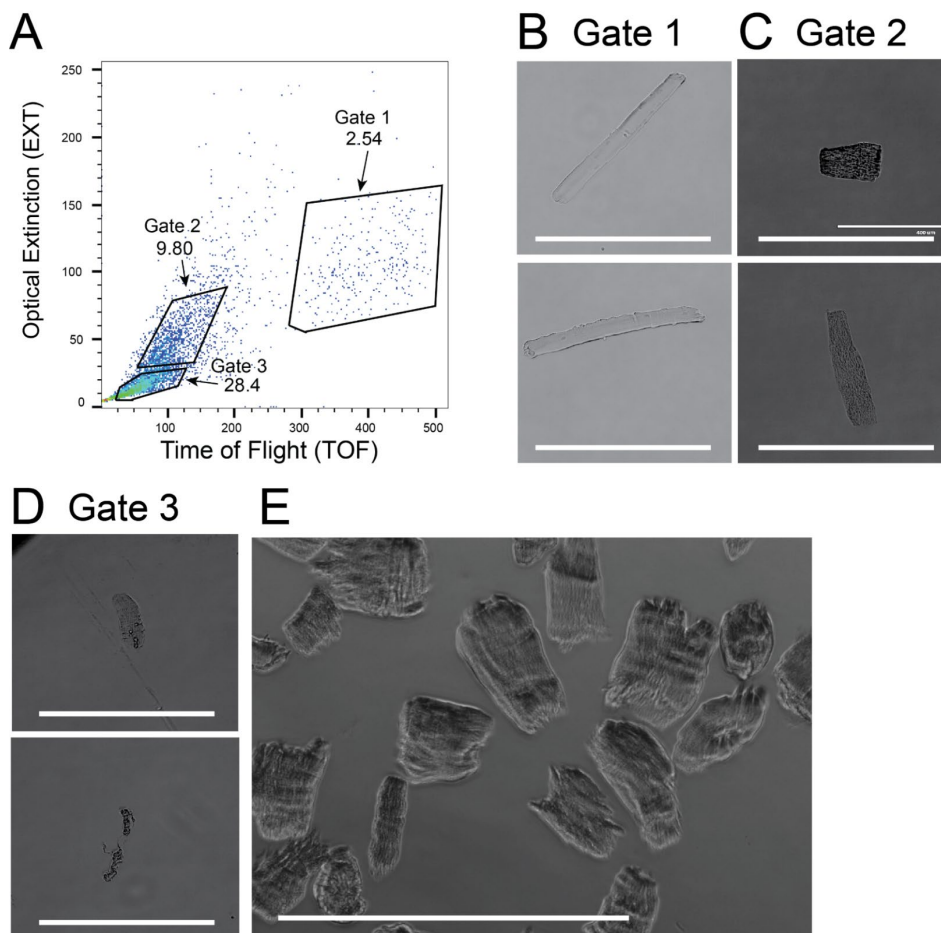

**Supplementary Figure 1.** Mouse skeletal muscle myocyte preparation. A) Flow cytometry showing three gated areas representing EXT-high/TOF-high, EXT-high/TOF-low and EXT-low populations of flexor digitorum brevis myocytes. B) Representative images of Gate 1 EXT-high/TOF-high. C) Representative images of Gate 2 EXT-high/TOF-low. D) Representative images of Gate 3 EXT-low. E) Representative image of pseudo-biopsy isolated myocyte fragments. Gates 1 and 2 were used for library preparation. White size bar is 400  $\mu$ m.

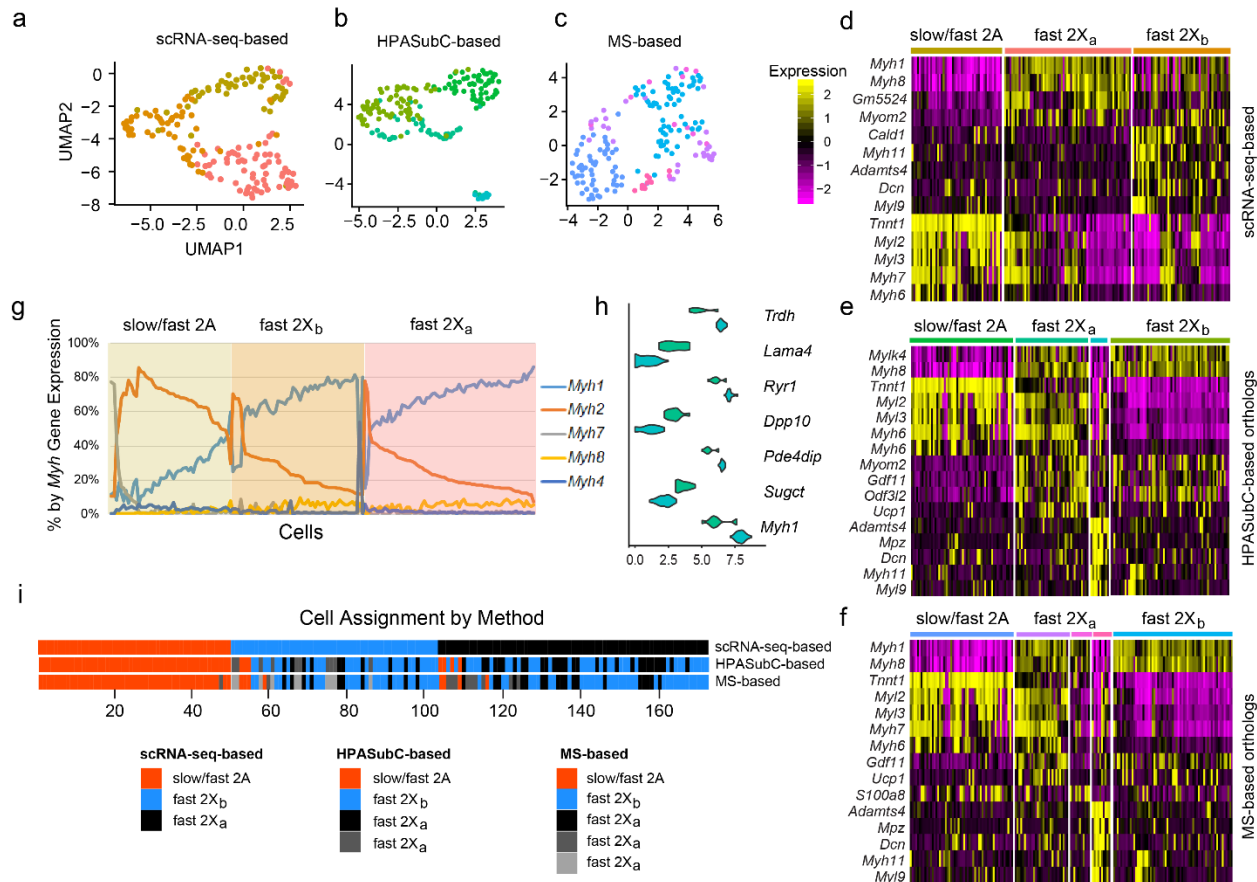

**Fig. 1. a)** UMAP graph of 171 skeletal muscle cells based on variable gene expression determined by scRNA-seq. **b)** UMAP graph based on mouse orthologous expression of HPASubC variable proteins. **c)** UMAP graph based on mouse orthologous expression of MS variable proteins. **d-f)** Heat maps of major genes expression differences between the different fiber types based on the different datasets. **g)** Major myosin heavy chain distributions across the 171 cells as a percentage of each heavy chain. The colored areas are the assignments of each cell based on the scRNA-seq-based data. **h)** Violin plots of 7 genes that varied between the two fast 2X<sub>a</sub> groups in the HPASubC-based data set. **i)** Assignment of each skeletal myocyte to a fiber type across the three methods. Strong agreement existed for the slow/fast 2A cells by any method of analysis

113 groups were observed in a UMAP dimensionality reduction plot. The first cluster, containing 69  
 114 cells (40% of all cells) had elevated expression of *Myh1* and *Myh8* clearly identifying this group  
 115 as containing fast 2X type cells and denoted as fast 2X<sub>a</sub> (Fig. 1d). A second cluster (N=53 cells)  
 116 had slightly more variable *Myh1* and *Myh8* differential expression, but by overall *Myh* gene  
 117 expression, Fig. 1g, also appeared to be a fast 2X cell type (denoted fast 2X<sub>b</sub>). Of note, *Myh4*, a

118 myosin heavy chain associated with fiber type 2B, was elevated in a single cell in this group  
119 (Fig. 1g) (3).

120 A third cluster (3) containing 49 cells (29% of the total) was defined by high expression  
121 of *Tnnt1* and *Myh2*. A deeper analysis of this group showed that 12 cells had high to modestly  
122 elevated *Myh7* expression (a slow-twitch marker), indicating this cluster was a combination of  
123 slow-twitch cells and fast 2A fibers (Fig. 1g). The flexor digitorum brevis is a fast twitch  
124 muscle, thus the overall distribution of significantly more fast (159) to slow fibers (12) is  
125 consistent with expected.

126 Interestingly, the expression patterns of the main fast/slow differentiating *Myh* genes was  
127 not as dichotomous as noted in protein based fiber type data (5). Here there were many more  
128 cells with intermediate levels and coexpression of *Myh1* and *Myh2* suggesting higher gene  
129 plasticity and more cell hybrids (Fig. 1g) (3).

### 130 **HPA-based mosaic protein discovery**

131 To complement variable gene expression data, we generated mosaic protein data by  
132 performing an analysis of the IHC-based HPA dataset of skeletal muscle images using the  
133 HPASubC suite of tools (20). The HPASubC tool, obtains a selected organs' images from the  
134 Human Protein Atlas (HPA) and allows rapid and agnostic interrogation of images for staining  
135 patterns of interest. This approach established a protein-based list of mosaically-expressed  
136 proteins. Out of 50,351 images reviewed for 10,301 unique proteins, 2,164 proteins had possible  
137 mosaic expression in skeletal muscle. Based on the aggregate image scores assigned to each  
138 protein, they were subsetted into categories of “real” mosaicism (374 proteins), “likely”  
139 mosaicism (1,231 proteins), and “unknown” probability of mosaicism (559 proteins)  
140 (Supplementary Data 1, Supplementary Fig. 2). For analysis purposes, we focused on the 1,605

141 proteins that were in the “real” or “likely” categories to reduce the incidence of false positive  
142 staining.

143 This method identified the well-known fiber type specific proteins such as MYH1,  
144 MYH2, MY4, MYH6, MYH7, and MYH8 that were categorized as both “real” or “likely” based  
145 on staining patterns (Supplementary Data 1). It also identified numerous uncharacterized or  
146 poorly characterized proteins, such as the zinc finger proteins ZNF213, ZNF282, ZNF343,

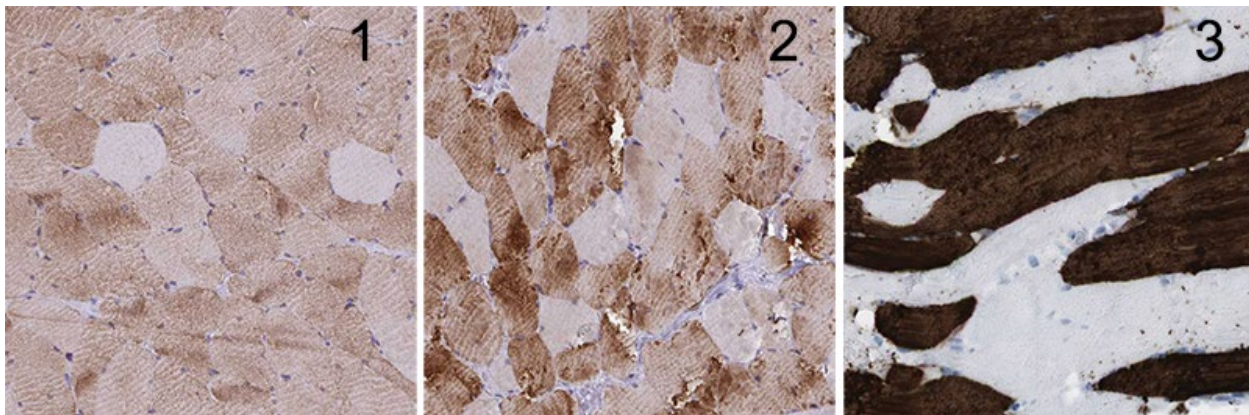

**Supplementary Figure 2.** Scoring schema for HPASubC-based skeletal muscle mosaicism. A score of 1 indicated an “unknown” mosaicism based on subtle differences in stain intensity, or inconsistent patterns. A score of 2, “likely,” was a clear distinction of staining by myofiber but the staining was not robust. A score of 3 “real” identified clear and robust staining differences by muscle cell. The score was primarily about the pattern and secondarily about the intensity of the staining difference.

147 ZNF350 and ZNF367 all of which had “real” patterns of mosaicism. A limitation of this spatial,  
148 IHC-based approach is that each protein image is independent of other proteins. Thus, one  
149 cannot identify co-expression patterns to assign proteins to certain fiber types.

150 We therefore investigated how these 1,605 proteins might inform on fiber type of  
151 skeletal muscle cells by using this list to subset the orthologous mouse gene data from the  
152 scRNA-seq experiment. Using just these orthologous mouse genes, we regenerated the UMAP  
153 plot that identified four clusters (Fig. 1b). It essentially recapitulated the fast and slow fibers  
154 types noted from the exclusive scRNA-seq data, despite being based on a different set of genes.



155 Uniquely, it subsetted the fast 2X<sub>a</sub> cluster into two groups, one denoted by high expression of  
156 *Myom2* and *Gdf11* and the other denoted by high *Ucp1* and *Adamts4* (Fig. 1e). A t-test of gene  
157 expression comparing genes from just these two subsets of the fast 2X<sub>a</sub> cluster identified  
158 multiple genes variably expressed between them (Fig. 1h). Although the cell clustering was  
159 generally similar between mouse scRNA-seq gene data and HPASubC data with regard to  
160 slow/fast 2A vs fast 2X, it was unclear which method was more representative. Therefore, we  
161 obtained a public MS dataset as a third method to classify slow and fast twitch fibers.

### 162 Fast/slow twitch variation by MS-based proteomics

163 The human skeletal muscle fiber MS data in Murgia et al. is based on 152 fibers from  
164 eight donors (5). This dataset had 596 proteins with >2.3 fold variation between type 1 and type

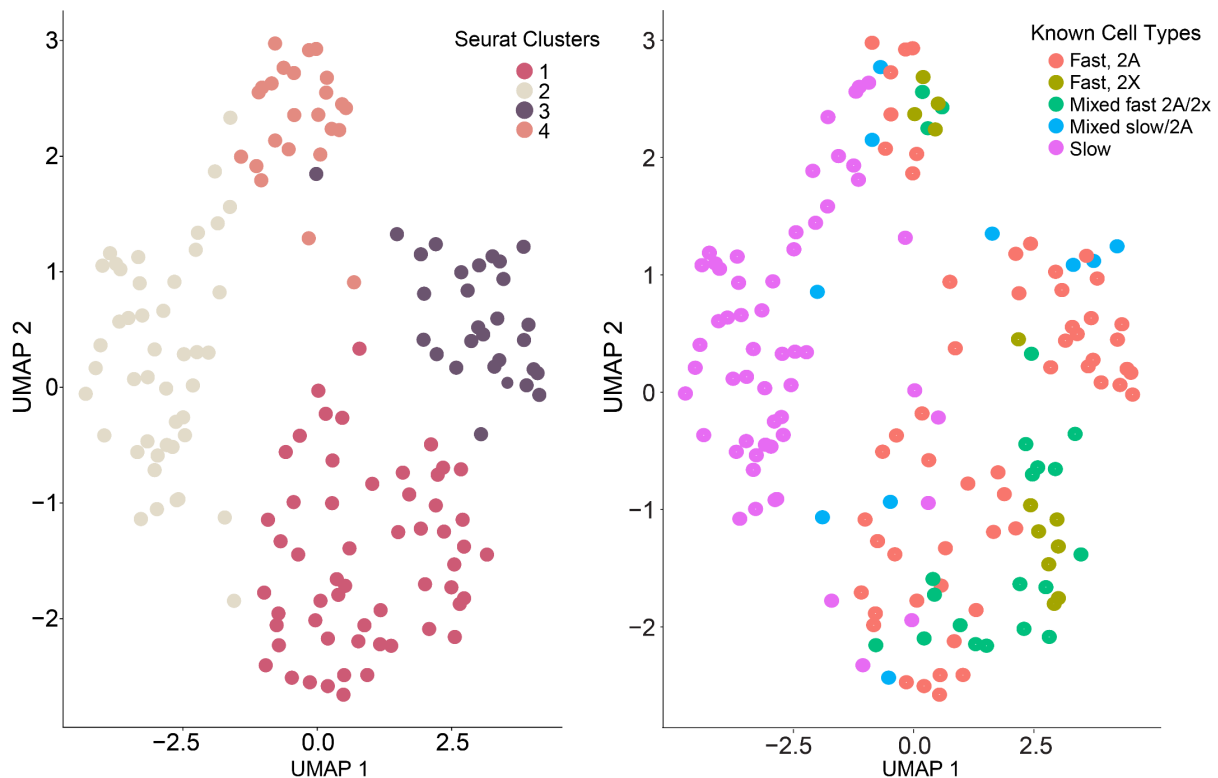

**Supplementary Figure 3.** UMAP of MS-based protein data by cell type. **A)** Seurat identified four cell clusters. **B)** UMAP was coloured based on cell assignments of Murgia et al. The slow type cells are generally Seurat cluster 2. Fast 2A cells are generally in Seurat cluster 3, although they are also detected in clusters 1 and 3. Fast 2X clusters are predominately in Seurat cluster 1.

165 2A fibers. We analyzed the full LFQ dataset of protein expression and constructed a UMAP plot  
166 that showed four clusters (Supplementary Fig. 3). One cluster was composed primarily of slow  
167 type 1 fibers and was adjacent to a second cluster with a small mixture of slow and other cell  
168 types. Two other clusters were primarily a collection of fast 2X and fast 2A cell types. Similar to  
169 the HPASubC approach above, we subsetted the orthologous mouse genes to these 596 proteins  
170 to explore cell fiber type assignment.

171 As seen in the UMAP plot, five groups were identified (Fig. 1c). Similar to the other two  
172 datasets (scRNA-seq and HPASubC), a slow/fast 2A fiber type was denoted by elevated  
173 expression of several genes including *Tnnt1* and *Myl2* (Fig. 1f). One fast 2X fiber group (2X<sub>b</sub>)  
174 was identified by high expression of *Myh1* and *Myh8*. The second fast 2X fiber group was then  
175 subdivided into three groups based on alternative elevated expression of genes that include  
176 *Gdf11* and *Ucp1* (group 3), *S100A8* (group 4) and *Adamts4* and *Mpz* (group 5). Unlike the  
177 protein expression level based UMAP, slow fibers and fast 2A fibers were not distinct.  
178 (Supplementary Fig. 3). This difference may be a result of the higher percentage of slow fibers in  
179 the MS dataset.

### 180 **Cross comparisons of the three approaches yield similar cell types.**

181 We identified the cluster assignment of each skeletal muscle cell based on the scRNA-  
182 seq, HPASubC, and MS approaches. We then plotted this information to demonstrate the extent  
183 to which there was fluidity in assignment by fiber type (Fig. 1i). All but one cell (48/49)  
184 assigned to the slow/fast 2A cluster based on scRNA-seq data remained in that cluster using  
185 other methods of clustering (HPASubC and MS). An additional 7-8 cells from the fast 2X groups  
186 became assigned to the slow/fast 2A cluster using the other methods of cell assignment. Cells  
187 moved interchangeably between the fast 2X<sub>a</sub> and fast 2X<sub>b</sub> clusters depending on the method used

188 to cluster. We used this information to try and understand what distinguished fast 2X<sub>a</sub> and fast  
189 2X<sub>b</sub> clusters.

### 190 **The 2X<sub>a</sub> and fast 2X<sub>b</sub> clusters differ by axonal genes.**

191 To understand if the two fast 2X clusters represent unique cell types, cell states, or some  
192 technical division, we performed a differential expression to determine what genes drove their  
193 differences. Of 5,260 genes compared, 557 genes were differentially expressed (t. test; adj. p.  
194 value <0.01). A Gene Ontology (GO) analysis on the 557 genes identified an enrichment of the  
195 cellular component “neuronal synapse,” suggesting variability at the NMJ. A further review of  
196 the top significant genes showed that >20 genes appear to have neuronal origins (*Cdh4*, *Cdkl5*,  
197 *Cntn4*, *Dscam*, *Gabbr2*, *Kirrel3*, *Lingo2*, *Lrp1*, *L1cam*, *Nrcam*, *Ntn1*, *Ntrk3*, *Ptprr1*, *Ptpro*, *Robo2*,  
198 *Sdk1*, *Sema5a*, *Sema6d*, *Shank2*, *Sox5*, *Tnr*, and *Wwox*). Of these, NRTK3, LRP1, and ROBO2  
199 were identified as mosaic in skeletal muscle cells by HPASubC. Additionally, in HPA images,  
200 seven orthologous proteins of these “neuronal” genes showed moderate staining, but each of  
201 these had a TPM <1 (from GTEx expression data). Only LRP1 was identified in the orthologous  
202 MS-dataset. This variability made us wonder how frequently the same genes/proteins were noted  
203 to be mosaic by each of the three methods.

### 204 **There is limited overlap of shared expression information**

205 We compared the 3,000 most variable genes, the 1,605 HPASubC proteins, and the 596  
206 MS proteins for shared patterns of mosaicism (Fig. 2). Only 23 genes/proteins were mosaic by  
207 all three approaches using the Seurat analysis method (Fig. 2a). An additional 300  
208 genes/proteins were shared across two methods, with the most overlap identified between the  
209 two datasets with the most genes/proteins. Thus, we reasoned the abundance of genes/proteins  
210 by method was a major driver of overlap leading us to focus on the 3,052 transcripts shared by

211 all three approaches, regardless of their mosaic/variable status. This resulted in 157  
212 genes/proteins shared across any two methods with the most overlap between the two protein  
213 datasets (77 proteins) (Fig. 2c).

214 As so few genes were shared with the protein sets, we wondered if the computational  
215 approaches of the Seurat method limited the discovery of the correct variable genes. Therefore,

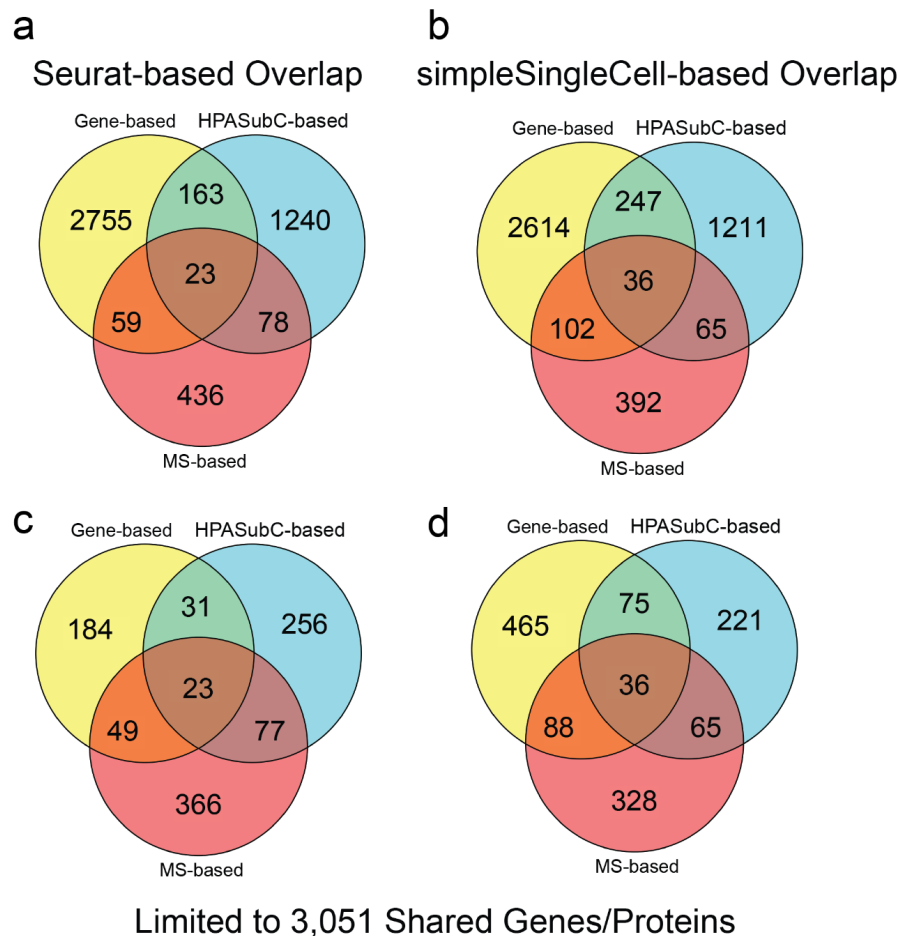

**Fig. 2.** Venn diagrams comparing the three methods and two analysis types with the full datasets (top) and the limited datasets (below). **a)** A Seurat-based overlap including all mosaic genes/proteins. **b)** A simpleSingleCell-based overlap including all mosaic genes/proteins. **c & d)** Seurat and simpleSingleCell-based methods limited to the 3,051 genes/proteins shared across the three studies.

216 we tried a second analysis approach, simpleSingleCell, to identify variable genes (21). By this  
217 method, there was an increase (N=36) in overlap of genes/proteins being identified by all three

218 methods and more genes/proteins being identified by two methods (414) (Fig. 2b). Interestingly,  
219 comparisons limited to the shared gene/protein list resulted in the highest overlap between the  
220 MS- and gene-based datasets (Fig. 2d). A third method of using differential expression on the  
221 scRNA-seq data to compare the subset of 12 slow-twitch cells to all fast twitch (2X and 2A) or  
222 just fast 2X cells gave equivalent data to the simpleSingleCell approach.

### 223 **Shared, abundant transcripts by cell type**

224 We then wondered about the extent to which highly abundant proteins/genes were driving  
225 our ability to detect mosaic proteins/genes. By normalized read counts of the scRNA-seq data,  
226 we determined the 50 most abundant transcripts by the average of each cell type in the three  
227 clusters determined by Seurat (Supplementary Data 2). Not surprisingly, the overall most  
228 abundant transcripts were *Ttn*, *Acta1* and *mt-Rnr2*. Of the 23 mosaic genes/proteins found by all  
229 three methods (using Seurat analysis), only *Myh1* and *Tnnt1* were on the list. Adding the mosaic  
230 genes from the simpleSingleCell analysis, seven additional genes (*Mylpf*, *Tnnt3*, *Tmp1*, *Tnni2*,  
231 *Eno3*, *Atp2a1* and *Pfkm*) were noted. This overall indicates that most abundant genes ( $\geq 41/50$ )  
232 are not consistently mosaic in skeletal myocytes.

### 233 **Species dichotomy in protein expression patterns**

234 The generally low amount of overlap across the methods was unexpected. We wondered  
235 if this discrepancy particularly between the gene and protein data was the result of species  
236 differences in twitch type expression. To address this, we investigated staining patterns for three  
237 proteins. Two (DCAF11, ENO3) were selected as they had clear mosaic staining by human  
238 HPASubC images and no gene variation by Seurat analysis of the scRNA-seq. PVALB was  
239 selected for showing variation by the mouse scRNA-seq data, but no variation by HPASubC.

240 DCAF11 was robustly mosaic in human but non-mosaic in mouse. ENO3 was mosaic in  
241 both and PVALB was weakly mosaic in human but robustly mosaic in the mouse tissue (Fig. 3).  
242 This data suggested that discrepancies may relate to differences in mosaic protein expression  
243 between species (DCAF11) and possible technical causes (PVALB). Because ENO3 was mosaic  
244 in the mouse skeletal muscle, but not mosaic by Seurat gene expression analysis, we explored if  
245 a posttranscriptional form of regulation was occurring.  
246

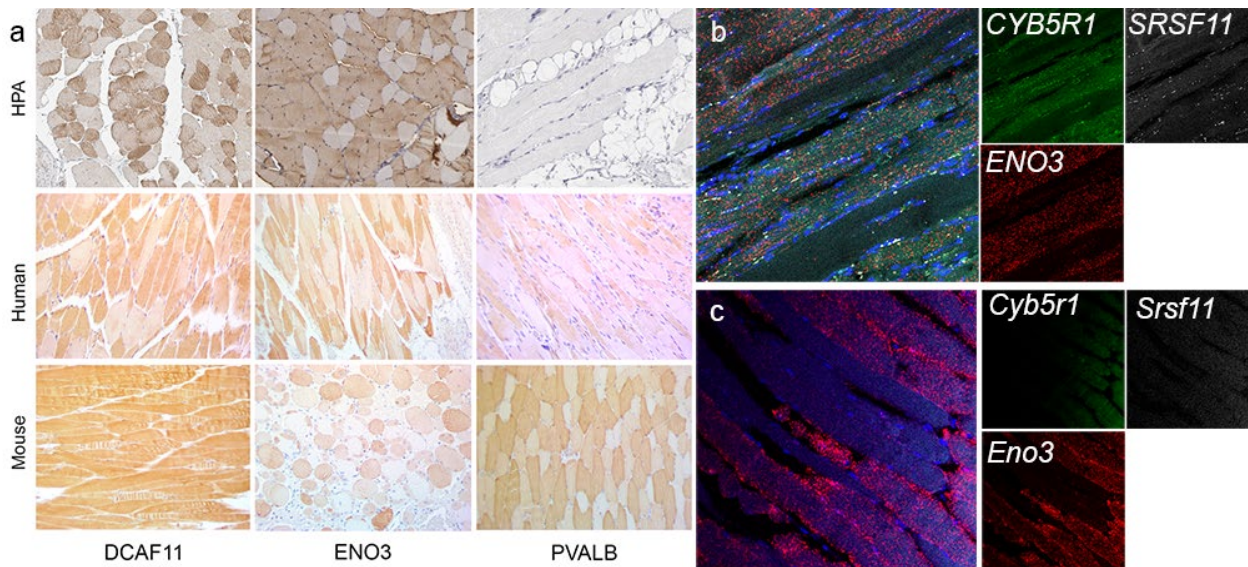

**Fig. 3. Representative IHC and RNA-ISH of discrepant proteins and genes.** a) HPA images (top row) are mosaic for DCAF11 and ENO3 and negative for PVALB staining. Follow up staining validated the DCAF11 and ENO3 staining while suggesting a subtle mosaicism of PVALB in humans. In mice, ENO3 and PVALB are clearly mosaic, while DCAF11 is not. b) RNA-ISH demonstrates co-expression of *CYB5R1* and *ENO3* in a mosaic pattern. c) Only *Eno3* was observed (in a mosaic pattern) in mouse muscle by RNA-ISH.

247  
248 **RNA-ISH indicates variable mosaicism**  
249 We performed RNA-ISH in both mouse and human skeletal muscles for *Eno3*, *Srsf11* and  
250 *Cyb5r1*. All of their protein products were mosaic by HPASubC and MS protein expression and  
251 had high or reasonably abundant gene expression (6552.8, 19.3, 201.5 pTPM respectively,

252 HPA). None of these genes were variably mosaic in the mouse gene data. We found mosaic co-  
 253 expression of all three genes in human skeletal muscle (Fig. 3). Whereas *ENO3* and *CYB5R1*  
 254 RNA was diffusely present across human skeletal myocytes, *SRSF11* was localized to sub-cell  
 255 membrane areas. In mouse muscle, *Eno3* was variably expressed, but neither *Cyb5r1* or *Srsf11*  
 256 were identified, although their levels of expression (~1,000x lower than *Eno3* in mouse) may be  
 257 too low to be seen by this method.

258 **Many highly-supported variably expressed proteins were not previously identified**

259 Thirty-six gene/proteins were variably expressed based on the simpleSingleCell,  
 260 HPASubC and MS based analyses (Fig. 2d, Table 1). Of these, based on an extensive literature  
 261 search, nine functionally diverse proteins are uniquely reported here as mosaic. Of the full 36,  
 262 22 were present in fast twitch myocytes and 14 in slow twitch myocytes based on the MS data.  
 263 In addition to these 36, another 414 genes/proteins were identified by two complementary  
 264 methods (Fig. 2). This includes well-known type specific proteins TNNC1 and TNNI1 (present  
 265 in the HPASubC and simpleSingleCell datasets, but not variably expressed in the MS dataset).

266 Finally, another 4,217 genes/proteins were variably expressed by one method. Of this  
 267 group, 1,211 were detected by HPASubC and 270 of these proteins were scored as “real” with  
 268 clear patterns of mosaicism (Supplementary Fig. 4).

| Gene Name                                                     | Gene Symbol | Muscle Type- MS based | HPASubC Confidence | Seurat Norm. Counts | Mosaic Status |
|---------------------------------------------------------------|-------------|-----------------------|--------------------|---------------------|---------------|
| ArfGAP With Coiled-Coil, Ankyrin Repeat And PH Domains 2      | Acap2       | Fast                  | Likely             | 1.79                | Unknown       |
| Adenylate Kinase 1                                            | Ak1         | Fast                  | Likely             | 5.75                | Known         |
| Aldolase, Fructose-Bisphosphate A                             | Aldoa       | Slow                  | Likely             | 7.98                | Known         |
| ATPase Sarcoplasmic/Endoplasmic Reticulum Ca2+ Transporting 1 | Atp2a1      | Fast                  | Real               | 6.68                | Known         |
| ATPase Sarcoplasmic/Endoplasmic Reticulum Ca2+ Transporting 2 | Atp2a2      | Slow                  | Real               | 2.08                | Known         |
| Calsequestrin 2                                               | Casq2       | Slow                  | Likely             | 1.61                | Known         |

|                                                                                                                 |        |      |        |      |         |
|-----------------------------------------------------------------------------------------------------------------|--------|------|--------|------|---------|
| CD36 Molecule                                                                                                   | Cd36   | Slow | Likely | 2.71 | Known   |
| Creatine Kinase, Mitochondrial 2                                                                                | Ckmt2  | Slow | Likely | 4.54 | Known   |
| DnaJ Heat Shock Protein Family (Hsp40) Member C3                                                                | Dnajc3 | Fast | Likely | 2.2  | Unknown |
| Enolase 3                                                                                                       | Eno3   | Fast | Real   | 6.97 | Known   |
| ELKS/RAB6-interacting/CAST Family Member 1                                                                      | Erc1   | Fast | Likely | 3.14 | Unknown |
| Glyceraldehyde-3-Phosphate Dehydrogenase                                                                        | Gapdh  | Fast | Likely | 5.91 | Known   |
| Glyoxalase Domain Containing 4                                                                                  | Glod4  | Slow | Likely | 1.79 | Unknown |
| Glycerol-3-Phosphate Dehydrogenase 1                                                                            | Gpd1   | Fast | Likely | 3.22 | Known   |
| Kinesin Family Member 5B                                                                                        | Kif5b  | Fast | Likely | 3.83 | Unknown |
| Lactate Dehydrogenase A                                                                                         | Ldha   | Fast | Real   | 5.81 | Known   |
| Lactate Dehydrogenase B                                                                                         | Ldhb   | Slow | Real   | 4.5  | Known   |
| Myosin Binding Protein C, Fast Type                                                                             | Mybpc2 | Fast | Real   | 5.2  | Known   |
| Myosin Heavy Chain 1                                                                                            | Myh1   | Fast | Real   | 7.91 | Known   |
| Myosin Heavy Chain 6                                                                                            | Myh6   | Slow | Likely | 1.79 | Known   |
| Myosin Heavy Chain 8                                                                                            | Myh8   | Fast | Likely | 5.41 | Known   |
| Myosin Light Chain, Phosphorylatable, Fast Skeletal Muscle                                                      | Mylpf  | Fast | Real   | 3.47 | Known   |
| Myosin Light Chain 3                                                                                            | Myl3   | Slow | Real   | 1.95 | Known   |
| Myozenin 2                                                                                                      | Myoz2  | Slow | Real   | 8.06 | Known   |
| PDZ And LIM Domain 1                                                                                            | Pdlim1 | Slow | Likely | 3.43 | Known   |
| Peroxisomal Biogenesis Factor 19                                                                                | Pex19  | Fast | Likely | 2.41 | Unknown |
| Phosphofruktokinase, Muscle                                                                                     | Pfkm   | Fast | Likely | 2.2  | Known   |
| Phosphoglycerate Kinase 1                                                                                       | Pgk1   | Fast | Likely | 3.67 | Known   |
| Ribosomal Protein S15a                                                                                          | Rps15a | Slow | Likely | 4.94 | Unknown |
| Thymosin Beta 4 X-Linked                                                                                        | Tmsb4x | Fast | Likely | 3.58 | Unknown |
| Troponin C2, Fast Skeletal Type                                                                                 | Tnnc2  | Fast | Real   | 1.1  | Known   |
| Troponin I2, Fast Skeletal Type                                                                                 | Tnni2  | Fast | Likely | 5.19 | Known   |
| Troponin T1, Slow Skeletal Type                                                                                 | Tnnt1  | Slow | Real   | 7.47 | Known   |
| Troponin T3, Fast Skeletal Type                                                                                 | Tnnt3  | Fast | Real   | 6.31 | Known   |
| Topomyosin 1                                                                                                    | Tpm1   | Fast | Likely | 7.97 | Known   |
| UDP-Glucose 6-Dehydrogenase                                                                                     | Ugdh   | Slow | Likely | 8.01 | Unknown |
| <b>Table 1.</b> 37 Genes/Proteins identified as mosaic by all three methods based on simpleSingleCell analysis. |        |      |        |      |         |

269

270 **Discussion**



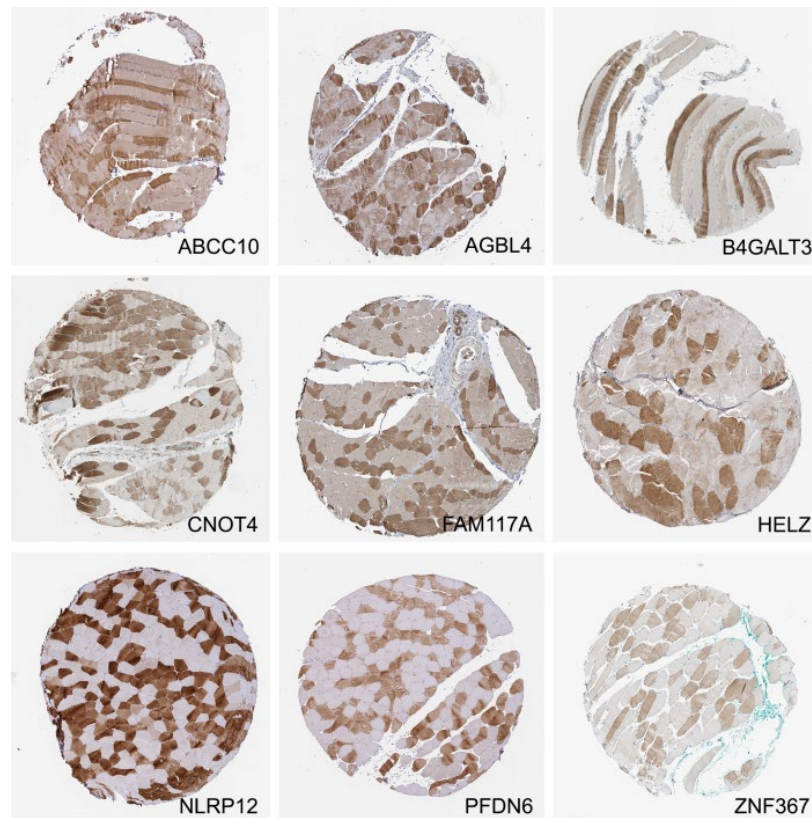

**Supplementary Figure 4.** Nine representative images of 270 proteins scored as real mosaicism using HPASubC, but not identified by other methods. All images from HPA.

271 We describe the first proteogenomic analysis of skeletal muscle single fiber types using  
272 combined scRNA-seq, spatial proteomics, and MS proteomics. Because delineations of skeletal  
273 muscle fiber types are known and this project was exclusive to this one cell type, our study is a  
274 useful model system to evaluate combining and synthesizing gene and protein data into a  
275 coherent description of a cell. Also, by utilizing a deep sequencing approach and fewer cells, we  
276 were not limited to just classifying a cell, but rather had sufficient data to delve into full gene  
277 expression. Our data identifies common themes across the methods, but also significant  
278 differences and complexities in gene/protein assignments.

279 Regardless of the method and genes/proteins used to cluster, we found general agreement  
280 on the major types of skeletal muscle myocytes. We identified a small group of slow twitch cells

281 that clustered with fast 2A cells. These groups were consistently clustered away from two  
282 clusters of fast 2X cells. The differences between these two fast 2X groups, described herein as  
283 2X<sub>a</sub> and 2X<sub>b</sub>, are open to interpretation. The simplest explanation is that some axonal material  
284 remained variably adherent to skeletal muscle cells through the NMJ, and these 20+ genes  
285 resulted in the separation observed by UMAP (Fig. 1a). This would imply a technical cause of  
286 the two fast 2X cell subtypes as a result of myocyte isolation. Adherent cell fragments are likely  
287 to be a global issue for some cell type isolation, although it would not impact nuclear scRNA-seq  
288 studies. A more interesting explanation is variable neuronal transfer of mRNAs across the NMJ  
289 into the skeletal muscles via extracellular vesicles (22, 23). This would imply a real state-  
290 difference in these cells, notable only by the deep sequencing strategy employed. Regardless, of  
291 which is accurate, this division is unlikely to indicate true separate fast 2X subtypes. In fact, the  
292 cross-referenced proteomic data was useful in demonstrating the arbitrary nature of this  
293 delineation (Fig. 1i).

294         The extent of overlap of mosaic genes/proteins across the methods was surprisingly low.  
295 Only 36 genes/proteins were cross-validated across all three approaches using the  
296 simpleSingleCell method (Table 1). This list included well-known, fiber-type specific proteins  
297 such as MYH1 and MYH6 and newly described mosaic proteins like DNAJC3 and GLOD4. The  
298 lack of agreement across methods has made it difficult to confidently state how many  
299 proteins/genes are variable by twitch pattern and further demonstrates the challenge of relying on  
300 a single method. If a gene or protein is mosaic by two methods, this number climbs to 450. If all  
301 mosaic genes and proteins are included, this increased to >4,500 genes/proteins. Over 1,600  
302 proteins appear to be mosaic by the HPASubC method alone (Supplementary Data 1 and  
303 Supplementary Fig. 4).

304           The reason for the variability in mosaic genes/proteins is certainly multifactorial. One  
305 potential major difference is the comparison across two separate species (mouse and human). As  
306 we noted with the DCAF11 IHC, this protein was mosaic in human muscle but did not appear to  
307 be mosaic in mouse. Secondly, some genes have markedly variable expression levels between  
308 the two species. While *CYB5R1* and *SRSF11* are robustly expressed in human muscle at 201.5  
309 and 19.3 pTPM (in HPA), they were only 17.7 and 1.9 FPKM in our mouse scRNA-seq. It is  
310 also possible that post-transcriptional regulation leads to more extreme expression variation in  
311 proteins than genes. As described above, extreme expression dichotomy in *Myh* genes was less  
312 than in similar MYH protein data (Fig. 1d) (5).

313           Our study represents the first use of LP-FACS to isolate single myofibers for scRNA-seq.  
314 As skeletal myocytes are often long, stretching across the length of a muscle, isolation  
315 techniques (particularly from human samples) may rely on the use of biopsies or otherwise  
316 fragmented myocytes. To test the effect of myocyte fragmentation on scRNA-seq data quality,  
317 we used a liberal gating strategy of our dissociated myocytes (including both EXT-high/TOF-  
318 low and EXT-high/TOF-high populations) as well as directly sequencing fragmented myocytes  
319 generated through a pseudo-biopsy approach. Disappointingly, we found that a large portion of  
320 our sequenced myocytes were of poor quality, including those from our pseudo-biopsy approach.  
321 By contrast, the highest quality data likely came from fully intact myocytes, in particular the  
322 EXT-high/TOF-high population. Because this population is almost completely enriched for  
323 intact myocytes, we believe that future experiments using LP-FACS to isolate skeletal myocytes  
324 should focus solely on the EXT-high/TOF-high population. We are confident that this will allow  
325 for a much higher percentage of good quality scRNA-seq libraries, akin to what we have  
326 observed previously with LP-FACS isolation of cardiac myocytes (17). These results also mean

327 that more work must be done to identify better isolation methods for human skeletal muscle.  
328 Current methods of human skeletal muscle biopsying from the quadriceps only obtains muscle  
329 fragments and thus more creative methods to obtain full length fibers or non-damaged fibers  
330 must be considered.

331 Technical factors also impact our ability to detect mosaicism on all platforms. Discovery  
332 mass spectrometry is challenged to identify low abundance proteins. Having low input from  
333 single fibers was further limiting and reduced the ability to computationally distinguish  
334 expression differences in low abundance proteins. Most fibers had between 500-700 proteins  
335 identified. As we have stated repeatedly, IHC in the HPA is subject to false positive staining  
336 from shared epitopes (20, 24-26). It also incurs false negative staining for failed antibodies or  
337 antibodies with staining parameters designed for other tissues. Further, some genes/proteins  
338 observed in the other datasets were missing from the HPA data. The gene data was also limited  
339 in the number of total cells analyzed (171) and the rarity of slow twitch cells from this muscle.  
340 Cross-cell contamination, may have also stunted the differences between cell types (27).

341 In conclusion, we have created the first proteogenomic analysis of gene/protein  
342 mosaicism in skeletal muscle. We replicated the known fiber types of slow, fast 2A, and fast 2X,  
343 as well as greatly expanded our understanding of genes and with variable expression across these  
344 cell types.

## 345 **Methods**

### 346 **Isolation and Sequencing of Adult Skeletal Myocytes**

347

348 Experiments were performed using C57BL/6J mice greater than 3 months of age. To isolate  
349 skeletal myocytes, we performed collagenase-based digestion of the flexor digitorum brevis

350 (FDB), a short muscle of the hind feet, as per previously established protocols (28). We tested  
351 two separate approaches to isolating myocytes. In the first approach, we dissected the FDB from  
352 tendon to tendon prior to digestion, enabling isolation of fully intact myocytes. In the second  
353 approach, we cut small portions of the FDB muscle using scissors. We reasoned that the latter  
354 approach would broadly mimic skeletal muscle biopsy as might be done, for example, from a  
355 human patient sample. The FDB was transferred to a dish containing DMEM with 1%  
356 penicillin/streptomycin, 1% fetal bovine serum, and 2mg/mL Collagenase Type II  
357 (Worthington). Muscle was digested for 1.5 hours in a 37C cell incubator with 5% CO<sub>2</sub>.  
358 Subsequently, the muscle was transferred to a dish containing media without collagenase, and  
359 gently triturated to release single myocytes. Large undigested chunks and tendons were removed  
360 with tweezers prior to single cell isolation.

361 We subsequently isolated single myocytes through large particle fluorescent-activated cell  
362 sorting (LP-FACS), using a flow channel size of 500 μm. The COPAS SELECT Flow Pilot  
363 Platform (Union Biometrica) was employed. Using time-of-flight (TOF, measuring axial length)  
364 and optical extinction (EXT, measuring optical density) parameters, we found that skeletal  
365 myocytes separated into three populations – an EXT-low population, EXT-high/TOF-low  
366 population, and EXT-high/TOF-high population (Supplementary Fig. 1A). The EXT-high/TOF-  
367 high population was comprised almost entirely of intact myofibers with lengths > 400 μm,  
368 suggesting successful sorting of large myocytes (Supplementary Fig. 1B). Interestingly, the  
369 EXT-high/TOF-low population was composed of what appeared to be rod-shaped fragments that  
370 maintained sarcomeric proteins, albeit disrupted (Supplementary Fig. 1C). The EXT-low  
371 population was comprised mostly of debris and dead cells, as previously observed with cardiac  
372 myocytes (Supplementary Fig. 1D). The EXT-high/TOF-low population qualitatively resembled

373 our pseudo-biopsy isolated myocyte fragments (Supplementary Fig. 1E), which also shared  
374 similar TOF and EXT parameters (not shown). To our knowledge, this is the first FACS-based  
375 single cell RNA-seq study of skeletal myocytes; thus, we adopted a broad gating strategy for  
376 isolation of single cells. We sorted 700 EXT-high myocytes (comprised of both TOF-high and  
377 TOF-low populations) as well as 100 myocyte fragments isolated through the pseudo-biopsy  
378 method.  
379 These sorted cells were placed individually into 96-well plates. Capture plate wells contained 5  
380  $\mu$ l of capture solution (1:500 Phusion High-Fidelity Reaction Buffer, New England Biolabs;  
381 1:250 RnaseOUT Ribonuclease Inhibitor, Invitrogen). Single cell libraries were then prepared  
382 using the previously described mcSCRB-seq protocol (18, 19). Briefly, cells were subjected to  
383 proteinase K treatment followed by RNA desiccation to reduce the reaction volume. RNA was  
384 subsequently reverse transcribed using a custom template-switching primer as well as a barcoded  
385 adapter primer. The customized mcSCRB-seq barcode primers contain a unique 6 base pair cell-  
386 specific barcode as well as a 10 base pair unique molecular identifier (UMI). Transcribed  
387 products were pooled and concentrated, with unincorporated barcode primers subsequently  
388 digested using Exonuclease I treatment. cDNA was PCR-amplified using Terra PCR Direct  
389 Polymerase (Takara Bio). Final libraries were prepared using 1ng of cDNA per library with the  
390 Nextera XT kit (Illumina) using a custom P5 primer as previously described.

391

### 392 **scRNA-seq sequencing and analysis**

393 Pooled libraries were sequenced on two high-output lanes of the Illumina NextSeq500 with a 16  
394 base pair barcode read, 8 base pair i7 index read, and a 66 base pair cDNA read design. To  
395 analyze sequencing data, reads were mapped and counted using zUMIs 2.2.3 with default

396 settings and barcodes provided as a list (29). zUMIs utilizes STAR (2.5.4b) (30) to map reads to  
397 an input reference genome and featureCounts through Rsubread (1.28.1) to tabulate counts and  
398 UMI tables (30, 31). Reads were mapped to the mm10 version of the mouse genome. We used  
399 GRCm38 from Ensembl concatenated with ERCC spike-in references for the reference genome  
400 and gene annotations. Dimensionality reduction and cluster analysis were performed with Seurat  
401 (2.3.4) (32).

#### 402 **Seurat and simpleSingleCell**

403 Analysis was performed using the Seurat R toolkit V3.1.1 for this dataset (32). Initial filtering  
404 removed lower quality cells (read count <5000 RNAs detected or >20% mitochondrial genes)  
405 before SCTransform normalization (33). A standard Seurat workflow was initially used for data  
406 analysis. This workflow identifies a subset of genes with high cell-to-cell variation within the  
407 scRNA-seq data. This subset is subsequently used as input to principal component analysis as  
408 well as downstream nonlinear dimensionality reduction methods such as Uniform Manifold  
409 Approximation and Projection (UMAP). Additionally, Seurat also allows for use of custom gene  
410 lists as input to downstream analysis. This allowed us to use two custom gene lists, specifically  
411 those derived from orthologous genes to mosaic proteins in the visual (HPASubC) dataset (20) or  
412 the differentially expressed proteins in the MS proteomic dataset (5). Thus each of our three gene  
413 lists, one produced by Seurat's workflow, another visual proteomic-based gene list, and a final  
414 mass spectrometry-based gene list defining known muscle cell types, were used one at a time to  
415 subset our initial data set and generate principal components for downstream analysis.

416 After determining clustering via these three approaches, UMAPs were generated alongside with  
417 heat maps representing the top genes in clusters as determined by each gene set used for PCA.  
418 Overlapping genes between the HPASubC data, MS data, and significant genes determined by

419 Seurat were also examined for overlaps. Gene expression for *Trdh*, *Lama4*, *Ryr1*, *Dpp10*,  
420 *Pde4dip*, *Sugct*, and *Myh1* was plotted across two fast 2X<sub>a</sub> clusters based on the HPASubC data.

421

## 422 **Simple Single Cell and Scrn**

423 Simple single cell 1.8.0 workflow was followed using scrn 1.12.1 for normalization of raw  
424 counts and fitting a mean-dependent trend to the gene-specific variances in single-cell RNA-seq  
425 data (21). In line with this, we decomposed the gene-specific variance into biological and  
426 technical components and selected the top 3000 genes for comparisons.

427

## 428 **RNA-ISH**

429 Mouse and human skeletal muscles were obtained at necropsy (>3 month old) and rapid autopsy  
430 (66 year old male), the latter under an IRB-approved protocol. Tissues were immediately fixed in  
431 formalin and paraffin-embedded blocks were created, from which 5 micron slides were made.

432 Custom probes for RNA *in situ* hybridization (RISH) were obtained from RNAscope (ACDBio).

433 These probes were designed to detect human and mouse forms of the following genes: *ENO3*

434 (GenBank accession nm\_001976.5), *CYB5R1* (nm\_016243.3), *SRSF11* (nm\_004768.5), *Eno3*

435 (nm\_007933.3), *Cyb5r1* (nm\_028057.3), and *Srsf11* (nm\_001093753.2). Each probe set targeted

436 all validated NCBI refseq transcript variants of the gene.

437 The Multiplex Fluorescent Reagent Kit v2 (ACDBio) was used following the manufacturer's

438 instructions. Briefly, FFPE tissue slides were baked for one hour at 60°C. The slides were

439 subsequently deparaffinized with xylene, rinsed with 100% ethanol and air-dried. After

440 application of hydrogen peroxide and washing, slides were treated with target retrieval reagent in

441 a steamer (>99°C) for 20 minutes. Then, the tissue was permeabilized using a protease.



442 Hybridization of the probes to the targeted mRNAs was performed by incubation in a 40°C oven  
443 for 2 hours. After washes, the slides were processed for the standard signal amplification and  
444 application of fluorescent dye (Opal dye 520, 570 and 620, AKOYA Biosciences) steps. Finally,  
445 the slides were counterstained with DIPA, mounted with Prolong Gold Antifade Mounting  
446 solution (Invitrogen) and stored in a 4°C room. The fluorescent images were obtained in the  
447 Johns Hopkins Microscope Core Facility using a Zeiss LSM700 Laser scanning confocal  
448 microscope.

449

#### 450 **Immunohistochemistry**

451 The same tissues described above were used for standard immunohistochemistry. Antibodies  
452 were obtained for WDR23/DCAF11 (bs-8388R, Bioss Antibodies), PVALB (A2781, Abclonal),  
453 and ENO3 (ARP48203\_T100, Aviva Systems Biology) that were reported to cross react to both  
454 human and mouse. Immunohistochemistry was performed as described previously (25, 34).

455

#### 456 **HPA and HPASubC**

457 The HPA is a comprehensive repository of IHC stained tissue microarrays for numerous  
458 tissues, including skeletal muscle (35, 36). The HPASubC tool can rapidly and agnostically  
459 interrogate images of the HPA to characterize specific staining patterns in organs (20, 24, 26).  
460 HPASubC v1.2.4 was used to download 50,351 skeletal muscle tissue microarray images  
461 covering 10,301 unique proteins from the HPA website (v18). The images were individually  
462 reviewed using HPASubC by K.M.F to evaluate the presence of a mosaic pattern of protein  
463 expression based on IHC staining. The classification of mosaicism was based on a pre-study  
464 training set of 300 images from HPA reviewed collaboratively (K.M.F and M.K.H). Mosaicism

465 was defined as a dispersed pattern of differential staining in which a significant number of non-  
466 adjacent muscle fibers had a higher staining intensity than the surrounding fibers, preferably  
467 persisting across the entire microarray. All positive selections made by the trainee were reviewed  
468 and rescored, as needed, by a board-certified pathologist (M.K.H.).

469 After an initial fast review of the images, a re-review to score the images was performed.  
470 A three-tiered classification system was used indicating increasing certainty of mosaicism: 0  
471 indicated the absence of mosaic staining; 1 indicated unknown mosaic staining; 2 indicated  
472 likely mosaic staining; 3 indicated real mosaic staining. Scoring evaluation was based on the  
473 quality of the mosaic pattern, including stain intensity differential between fibers, the presence of  
474 “blush”/incomplete staining within cells, and the consistency and completeness of the fiber  
475 staining pattern throughout the sample. HPASubC was used on an Apple MacBook Pro running  
476 macOS Sierra v10.12.6 with 8 GB RAM and 3.1 GHz CPU and a Dell Precision Tower 3620  
477 running Windows 10 with 16 GB RMA and a 3.7 GHz CPU.

478

### 479 **Conversion of gene and protein symbols**

480 To identify orthologs across human and mouse genes/proteins we had to synchronize  
481 across gene/protein names and across the species. We used the David Gene ID Conversion Tool  
482 (<https://david.ncifcrf.gov/conversion.jsp>), BioMart at Ensembl  
483 (<http://useast.ensembl.org/biomart/martview/e8a4fba4cb5c0be7a30841471b55674d>), UniProt  
484 Retrieve/ID mapping (<https://www.uniprot.org/uploadlists/>) and direct searches at both UniProt  
485 and GeneCards (<https://www.genecards.org/>), to cross integrate the human protein symbols,  
486 mouse gene symbols, human gene symbols and ENSG IDs (37-39).

487

## 488 **Gene Ontology (GO) Validation**

489 GO was performed on the 557 most variable genes between two fast 2X clusters (2X<sub>a</sub> and  
490 2X<sub>b</sub>) using the Gene Ontology resource (<http://geneontology.org/>) and selecting for cellular  
491 component.

492

## 493 **Mass Spectrometry (MS) Data Set**

494 We utilized the Murgia et al. human skeletal muscle fiber MS-based proteomic dataset  
495 (5). This contained information from 3,585 proteins across 152 fibers from 8 donors (5). The  
496 ratio of expression of proteins between Type 1 and Type 2A cells were determined using Table  
497 S6 of Murgia et al. Five hundred and ninety-six proteins with >2.3 fold differences between cell  
498 types were selected. Label-free quantification (LFQ) data, from Supplemental Table S4, for the  
499 154 human single muscle fiber proteomics was obtained. The log<sub>2</sub> transformed LFQ data was  
500 converted to raw values and only proteins expressed across all fiber types (n=94) were  
501 considered for plotting UMAP as described (5). Functions of the R-package Seurat (Version  
502 3.1.1) were executed sequentially to derive a UMAP along with its dependency library  
503 “uwot (Version 0.1.4)” in R (Version 3.6.1) (40, 41). A Seurat object of the data matrix was  
504 created using ‘CreateSeuratObject’ with default parameters. This data was normalized using the  
505 ‘NormalizeData’ function and outlier proteins were identified using the ‘FindVariableFeatures.’  
506 Proteins across the fiber types were scaled and centered to create a PCA object using ‘ScaleData’  
507 and ‘RunPCA’ respectively. Further, k-nearest neighbors and shared nearest neighbor for each  
508 fiber type were generated on the Seurat object using ‘FindNeighbors’ and ‘FindClusters’ to plot  
509 UMAP using ‘RunUMAP’. All of these functions were executed using default parameters. The

510 clustering obtained with UMAP was overlaid with the classification of muscle fiber types based  
511 on Murgia et al. using ggplot2 (Version 3.2.1).

#### 512 **Data availability**

513 Mouse skeletal muscle sequencing was deposited at the Sequence Read Archive (SRA –  
514 SRP241908) and the Gene Expression Omnibus (GSE143636).

#### 515 **Code availability**

516 All analysis scripts are available at GitHub  
517 ([https://github.com/mhalushka/Skeletal\\_muscle\\_mosaicism](https://github.com/mhalushka/Skeletal_muscle_mosaicism)).

518

#### 519 **Acknowledgements:**

520 The authors thank Efrain Ribeiro for his helpful comments on the project. M.K.H. was supported  
521 by grants 1R01HL137811, R01GM130564, and P30CA006973 from the National Institutes of  
522 Health and 17GRNT33670405 from the American Heart Association. T.O.N. was supported by  
523 grant R01GM130564. M.N.M. was supported by R01HL137811 and the University of Rochester  
524 CTSA award number UL1TR002001. A.Z.R was supported by R01GM130564. C.K. and S.K.  
525 were supported by NIH R01HD086026, TEDCO 2019-MSCRFD-5044, and the JHU Discovery  
526 Award. S.K. was supported by fellowship 20PRE35200028 from the American Heart  
527 Association.

528 **Contributions** K.M.F helped conceive the project and generated proteomic data. S.K. and  
529 B.L.L. generated the skeletal muscle sequencing library. X.Y and K.F-T. performed IHC and  
530 RISH. R.X.V., S.K., T.O.N, A.H.P. and M.N.M. performed analysis. C.K. and D.A.K. oversaw  
531 the library preparation. A.Z.R helped develop the project. M.K.H. conceived the project,

532 performed analyses and wrote the manuscript. All authors contributed toward revisions of the  
533 manuscript.

### 534 **Conflicts of interest**

535 The authors declare no conflicts of interest.

### 536 **References**

- 537 1. Okumura N, Hashida-Okumura A, Kita K, Matsubae M, Matsubara T, Takao T, et al.  
538 Proteomic analysis of slow- and fast-twitch skeletal muscles. *Proteomics*. 2005;5(11):2896-906.
- 539 2. Gonzalez-Freire M, Semba RD, Ubaida-Mohien C, Fabbri E, Scalzo P, Hojlund K, et al.  
540 The Human Skeletal Muscle Proteome Project: a reappraisal of the current literature. *J Cachexia*  
541 *Sarcopenia Muscle*. 2017;8(1):5-18.
- 542 3. Schiaffino S, Reggiani C. Fiber types in mammalian skeletal muscles. *Physiological*  
543 *reviews*. 2011;91(4):1447-531.
- 544 4. Drexler HC, Ruhs A, Konzer A, Mendler L, Bruckskotten M, Looso M, et al. On  
545 marathons and Sprints: an integrated quantitative proteomics and transcriptomics analysis of  
546 differences between slow and fast muscle fibers. *Molecular & cellular proteomics : MCP*.  
547 2012;11(6):M111 010801.
- 548 5. Murgia M, Toniolo L, Nagaraj N, Ciciliot S, Vindigni V, Schiaffino S, et al. Single  
549 Muscle Fiber Proteomics Reveals Fiber-Type-Specific Features of Human Muscle Aging. *Cell*  
550 *reports*. 2017;19(11):2396-409.
- 551 6. Murgia M, Nagaraj N, Deshmukh AS, Zeiler M, Cancellara P, Moretti I, et al. Single  
552 muscle fiber proteomics reveals unexpected mitochondrial specialization. *EMBO Rep*.  
553 2015;16(3):387-95.
- 554 7. Chemello F, Bean C, Cancellara P, Laveder P, Reggiani C, Lanfranchi G. Microgenomic  
555 analysis in skeletal muscle: expression signatures of individual fast and slow myofibers. *PLoS*  
556 *One*. 2011;6(2):e16807.
- 557 8. Giordani L, He GJ, Negroni E, Sakai H, Law JYC, Siu MM, et al. High-Dimensional  
558 Single-Cell Cartography Reveals Novel Skeletal Muscle-Resident Cell Populations. *Molecular*  
559 *cell*. 2019;74(3):609-21 e6.
- 560 9. Porpiglia E, Samusik N, Ho ATV, Cosgrove BD, Mai T, Davis KL, et al. High-resolution  
561 myogenic lineage mapping by single-cell mass cytometry. *Nature cell biology*. 2017;19(5):558-  
562 67.
- 563 10. Dell'Orso S, Juan AH, Ko KD, Naz F, Perovanovic J, Gutierrez-Cruz G, et al. Single cell  
564 analysis of adult mouse skeletal muscle stem cells in homeostatic and regenerative conditions.  
565 *Development*. 2019;146(12).
- 566 11. Cho DS, Doles JD. Single cell transcriptome analysis of muscle satellite cells reveals  
567 widespread transcriptional heterogeneity. *Gene*. 2017;636:54-63.
- 568 12. Cornelison DD, Wold BJ. Single-cell analysis of regulatory gene expression in quiescent  
569 and activated mouse skeletal muscle satellite cells. *Developmental biology*. 1997;191(2):270-83.
- 570 13. Cacchiarelli D, Qiu X, Srivatsan S, Manfredi A, Ziller M, Overbey E, et al. Aligning  
571 Single-Cell Developmental and Reprogramming Trajectories Identifies Molecular Determinants  
572 of Myogenic Reprogramming Outcome. *Cell Syst*. 2018;7(3):258-68 e3.

- 573 14. Trapnell C, Cacchiarelli D, Grimsby J, Pokharel P, Li S, Morse M, et al. The dynamics  
574 and regulators of cell fate decisions are revealed by pseudotemporal ordering of single cells.  
575 *Nature biotechnology*. 2014;32(4):381-6.
- 576 15. Rubenstein AB, Smith GR, Raue U, Begue G, Minchev K, Ruf-Zamojski F, et al. Single-  
577 cell transcriptional profiles in human skeletal muscle. *Scientific reports*. 2020;10(1):229.
- 578 16. Blackburn DM, Lazure F, Corchado AH, Perkins TJ, Najafabadi HS, Soleimani VD.  
579 High-Resolution Genome-Wide Expression Analysis of Single Myofibers Using SMART-Seq. *J*  
580 *Biol Chem*. 2019.
- 581 17. Kannan S, Miyamoto M, Lin BL, Zhu R, Murphy S, Kass DA, et al. Large Particle  
582 Fluorescence-Activated Cell Sorting Enables High-Quality Single-Cell RNA Sequencing and  
583 Functional Analysis of Adult Cardiomyocytes. *Circ Res*. 2019;125(5):567-9.
- 584 18. Soumillon M, Cacchiarelli D, Semrau S, van Oudenaarden A, Mikkelsen TS.  
585 Characterization of directed differentiation by high-throughput single-cell RNA-Seq. *BioRxiv*.  
586 2014.
- 587 19. Ziegenhain C, Vieth B, Parekh S, Reinius B, Guillaumet-Adkins A, Smets M, et al.  
588 Comparative Analysis of Single-Cell RNA Sequencing Methods. *Molecular cell*.  
589 2017;65(4):631-43 e4.
- 590 20. Cornish TC, Chakravarti A, Kapoor A, Halushka MK. HPASubC: A suite of tools for  
591 user subclassification of human protein atlas tissue images. *Journal of pathology informatics*.  
592 2015;6:36.
- 593 21. Lun AT, McCarthy DJ, Marioni JC. A step-by-step workflow for low-level analysis of  
594 single-cell RNA-seq data with Bioconductor. *F1000Research*. 2016;5:2122.
- 595 22. Ashley J, Cordy B, Lucia D, Fradkin LG, Budnik V, Thomson T. Retrovirus-like Gag  
596 Protein Arc1 Binds RNA and Traffics across Synaptic Boutons. *Cell*. 2018;172(1-2):262-74 e11.
- 597 23. Korkut C, Ataman B, Ramachandran P, Ashley J, Barria R, Gherbesi N, et al. Trans-  
598 synaptic transmission of vesicular Wnt signals through Evi/Wntless. *Cell*. 2009;139(2):393-404.
- 599 24. Anene DF, Rosenberg AZ, Kleiner DE, Cornish TC, Halushka MK. Utilization of  
600 HPASubC for the identification of sinusoid-specific proteins in the liver. *Journal of proteome*  
601 *research*. 2016;15(5):1623-9.
- 602 25. Wang TY, Lee D, Fox-Talbot K, Arking DE, Chakravarti A, Halushka MK.  
603 Cardiomyocytes have mosaic patterns of protein expression. *Cardiovasc Pathol*. 2018;34:50-7.
- 604 26. Cheah JX, Nieuwenhuis TO, Halushka MK. An expanded proteome of cardiac t-tubules.  
605 *Cardiovasc Pathol*. 2019;42:15-20.
- 606 27. Nieuwenhuis TO, Yang S, Verma RX, Pillalamarri V, Arking DE, Rosenberg AZ, et al.  
607 Basal Contamination of Sequencing: Lessons from the GTEx dataset. *BioRxiv*. 2019.
- 608 28. Shefer G, Yablonka-Reuveni Z. Isolation and culture of skeletal muscle myofibers as a  
609 means to analyze satellite cells. *Methods Mol Biol*. 2005;290:281-304.
- 610 29. Parekh S, Ziegenhain C, Vieth B, Enard W, Hellmann I. zUMIs - A fast and flexible  
611 pipeline to process RNA sequencing data with UMIs. *Gigascience*. 2018;7(6).
- 612 30. Dobin A, Davis CA, Schlesinger F, Drenkow J, Zaleski C, Jha S, et al. STAR: ultrafast  
613 universal RNA-seq aligner. *Bioinformatics*. 2013;29(1):15-21.
- 614 31. Liao Y, Smyth GK, Shi W. The Subread aligner: fast, accurate and scalable read mapping  
615 by seed-and-vote. *Nucleic Acids Res*. 2013;41(10):e108.
- 616 32. Butler A, Hoffman P, Smibert P, Papalexi E, Satija R. Integrating single-cell  
617 transcriptomic data across different conditions, technologies, and species. *Nature biotechnology*.  
618 2018;36(5):411-20.

- 619 33. Hafemeister C, Satija R. Normalization and variance stabilization of single-cell RNA-seq  
620 data using regularized negative binomial regression. *BioRxiv*. 2019.
- 621 34. Wang TY, Arking DE, Maleszewski JJ, Fox-Talbot K, Nieuwenhuis TO, Santhanam L, et  
622 al. Human cardiac myosin light chain 4 (MYL4) mosaic expression patterns vary by sex.  
623 *Scientific reports*. 2019;9(1):12681.
- 624 35. Uhlen M, Fagerberg L, Hallstrom BM, Lindskog C, Oksvold P, Mardinoglu A, et al.  
625 Proteomics. Tissue-based map of the human proteome. *Science*. 2015;347(6220):1260419.
- 626 36. Uhlen M, Oksvold P, Fagerberg L, Lundberg E, Jonasson K, Forsberg M, et al. Towards  
627 a knowledge-based Human Protein Atlas. *Nature biotechnology*. 2010;28(12):1248-50.
- 628 37. Yates A, Akanni W, Amode MR, Barrell D, Billis K, Carvalho-Silva D, et al. Ensembl  
629 2016. *Nucleic Acids Res*. 2016;44(D1):D710-6.
- 630 38. The UniProt C. UniProt: the universal protein knowledgebase. *Nucleic Acids Res*.  
631 2017;45(D1):D158-D69.
- 632 39. Fishilevich S, Zimmerman S, Kohn A, Iny Stein T, Olender T, Kolker E, et al. Genic  
633 insights from integrated human proteomics in GeneCards. *Database : the journal of biological*  
634 *databases and curation*. 2016;2016.
- 635 40. Stuart T, Butler A, Hoffman P, Hafemeister C, Papalexi E, Mauck WM, 3rd, et al.  
636 *Comprehensive Integration of Single-Cell Data*. *Cell*. 2019;177(7):1888-902 e21.
- 637 41. Becht E, McInnes L, Healy J, Dutertre CA, Kwok IWH, Ng LG, et al. Dimensionality  
638 reduction for visualizing single-cell data using UMAP. *Nature biotechnology*. 2018.  
639
